# Supplementary material for: Burden of asthma and COPD overlap (ACO) in Taiwan: a nationwide population-based study
Source: PubMed Central journal article supplement (PMC5784537; doi:10.1186/s12890-017-0571-7), 2018-01-25
Supplement: 12890_2017_571_MOESM1_ESM.pdf [file 12890_2017_571_MOESM1_ESM.pdf]

## Burden of Asthma and COPD Overlap (ACO) in Taiwan: a Nationwide Population-Based Study – Supplementary Material

Supplementary Figure 1. Patient flow diagram for the COPD cohort

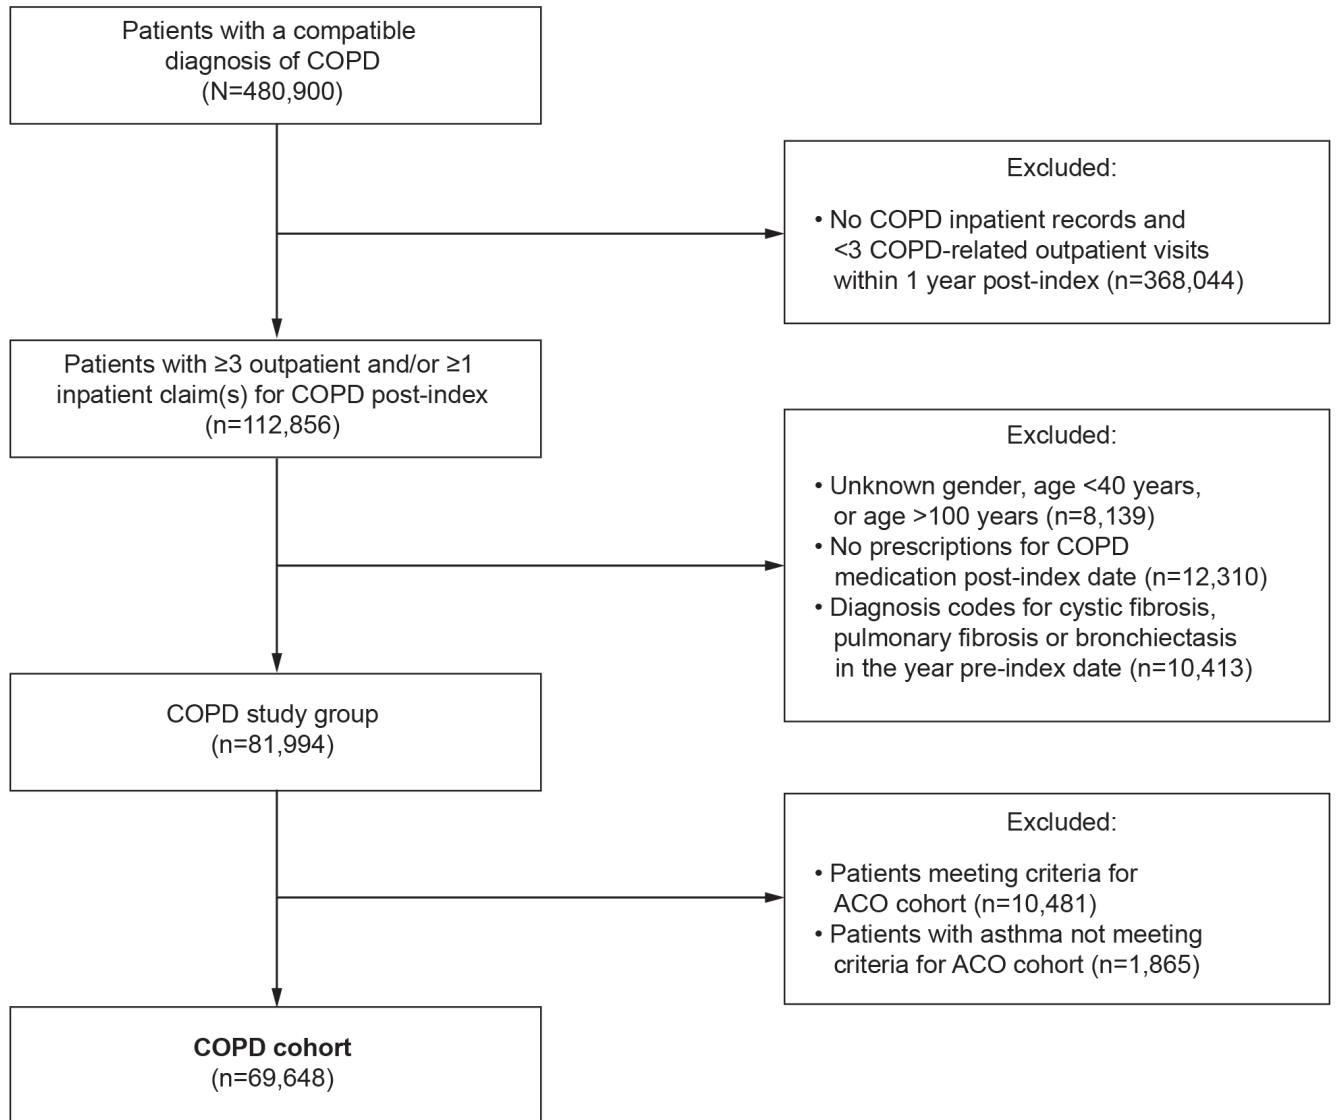

ACO, asthma-COPD overlap; COPD, chronic obstructive pulmonary disease.

**Supplementary Figure 2. Patient flow diagram for the asthma cohort**

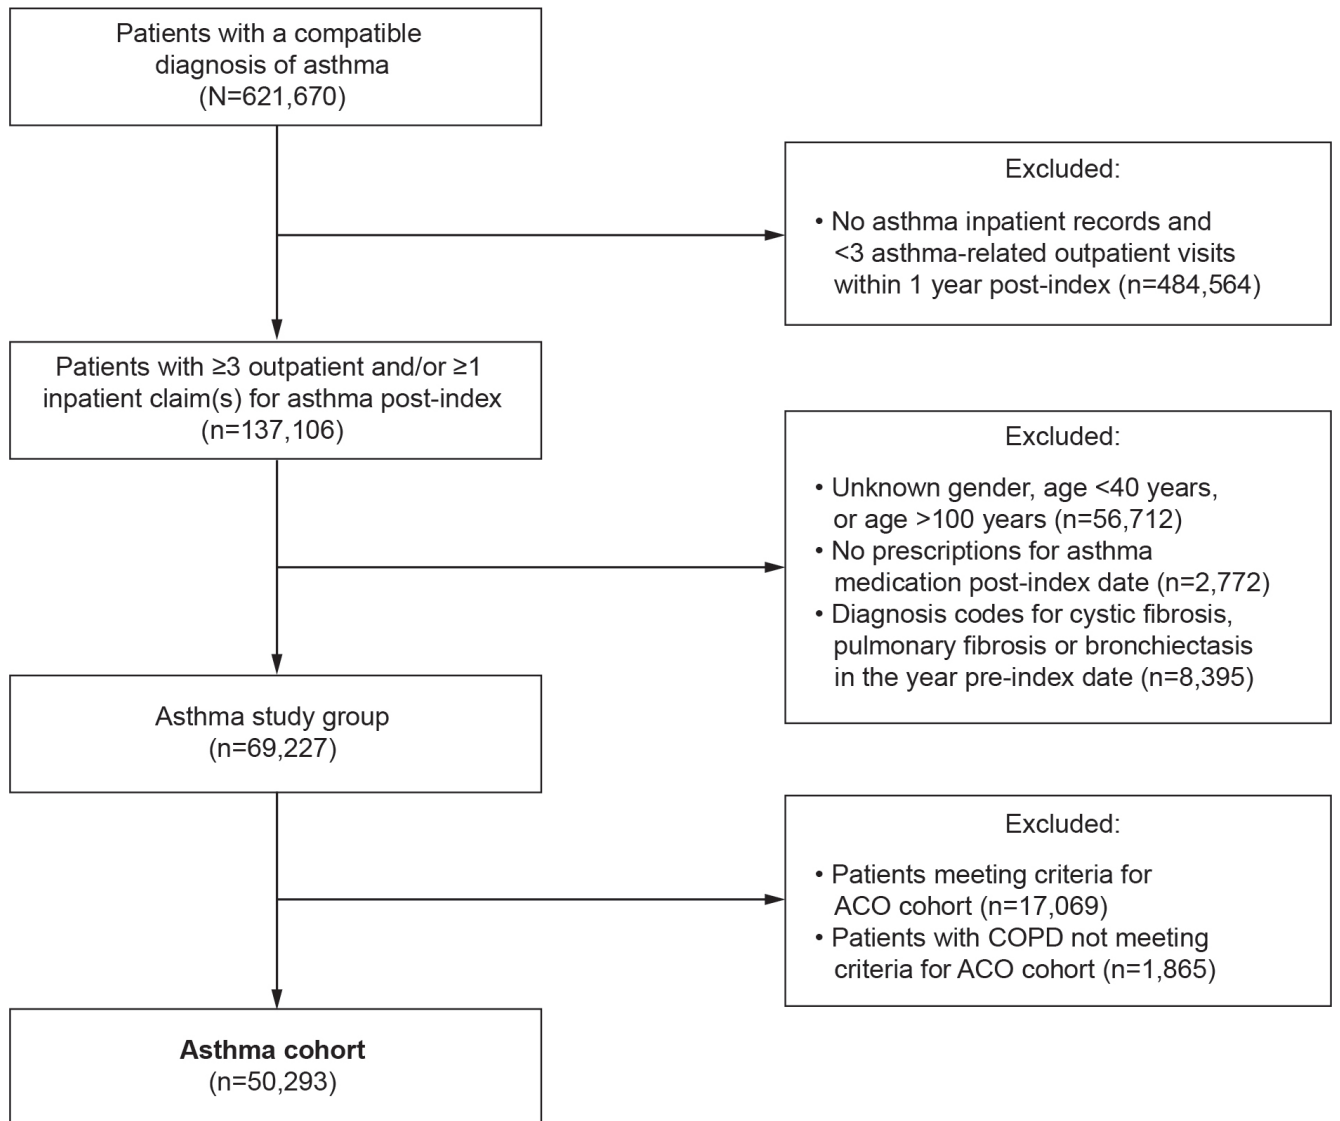

ACO, asthma-COPD overlap; COPD, chronic obstructive pulmonary disease.

**Supplementary Figure 3. Patient flow diagram for the ACO cohort and groups with different ACO definitions**

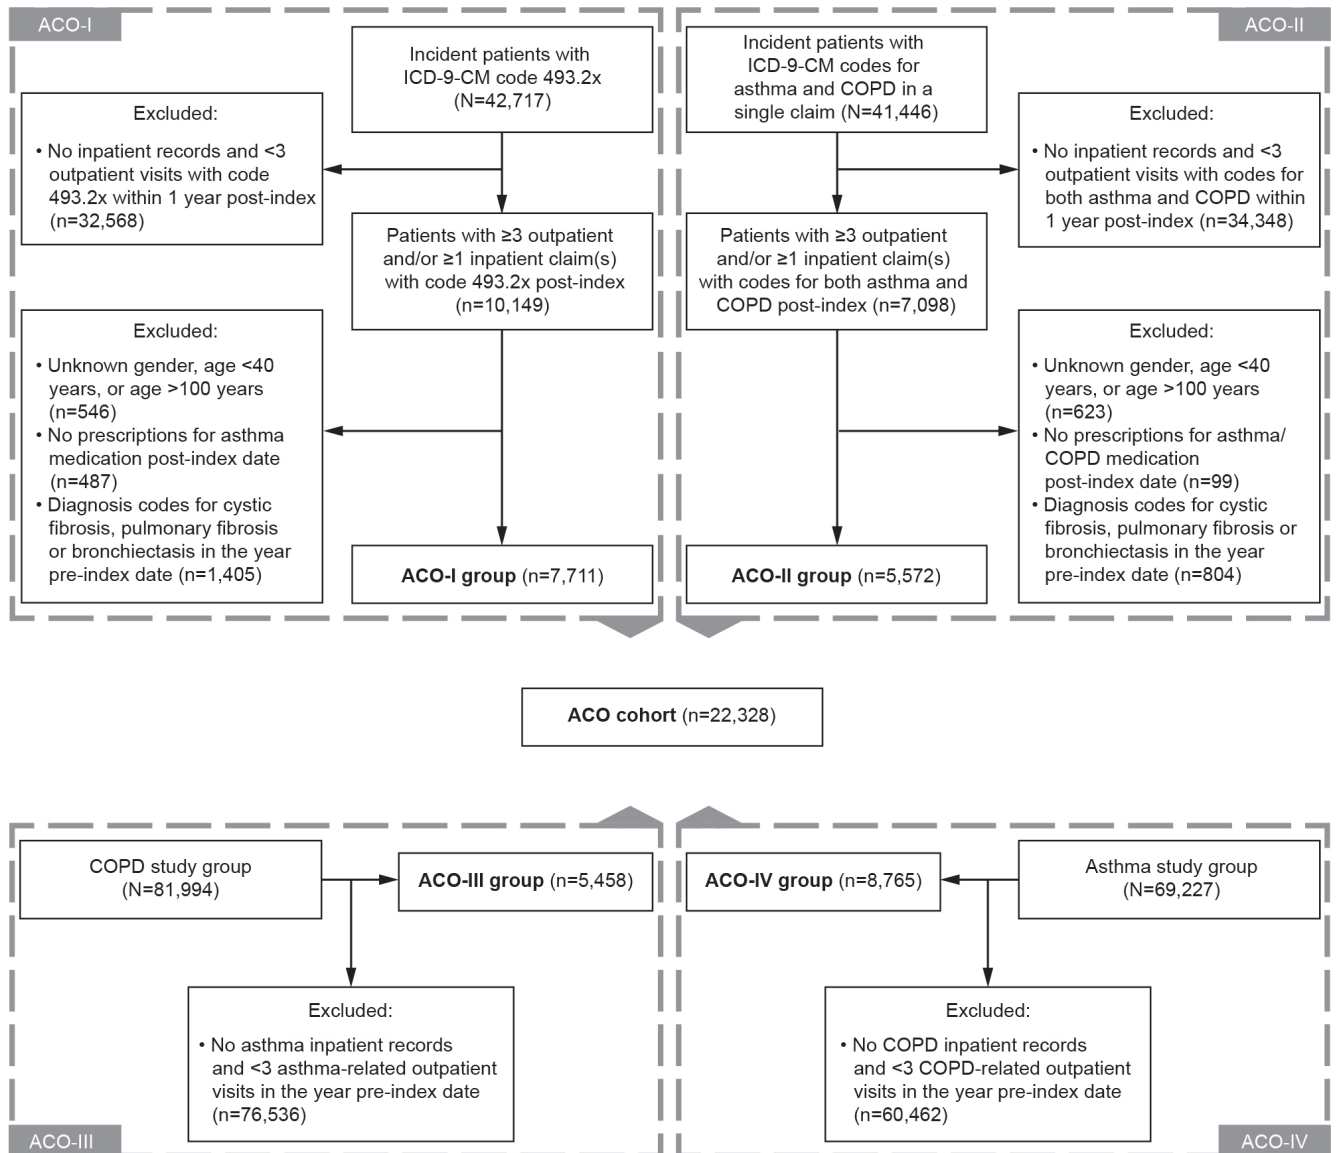

ACO, asthma-COPD overlap; COPD, chronic obstructive pulmonary disease; ICD-9-CM, International Classification of Diseases, ninth revision, clinical modification.

**Supplementary Table 1. Characteristics of the ACO cohort and groups with different ACO definitions at index date**

| Characteristics                                     | ACO cohort<br>(N=22,328) | ACO-I<br>group<br>(n=7,711) | ACO-II<br>group<br>(n=5,572) | ACO-III<br>group<br>(n=5,458) | ACO-IV<br>group<br>(n=8,765) | p-value<br>(ACO<br>cohort vs<br>ACO-I) | p-value<br>(ACO<br>cohort vs<br>ACO-II) | p-value<br>(ACO<br>cohort vs<br>ACO-III) | p-value<br>(ACO<br>cohort vs<br>ACO-IV) | p-value<br>(5 groups) |
|-----------------------------------------------------|--------------------------|-----------------------------|------------------------------|-------------------------------|------------------------------|----------------------------------------|-----------------------------------------|------------------------------------------|-----------------------------------------|-----------------------|
| <b>Gender, n (%)</b>                                |                          |                             |                              |                               |                              |                                        |                                         |                                          |                                         |                       |
| Male                                                | 13,477 (60.4)            | 5,105 (66.2)                | 3,499 (61.9)                 | 2,864 (52.5)                  | 5,676 (64.8)                 | <0.0001                                | 0.0353                                  | <0.0001                                  | <0.0001                                 | <0.0001               |
| <b>Age</b>                                          |                          |                             |                              |                               |                              |                                        |                                         |                                          |                                         |                       |
| Mean (SD), years                                    | 68.73 (13.26)            | 69.67 (13.24)               | 65.77 (12.92)                | 66.21 (13.00)                 | 72.00 (12.70)                | <0.0001                                | <0.0001                                 | <0.0001                                  | <0.0001                                 | <0.0001               |
| <b>Socioeconomic status (monthly income), n (%)</b> |                          |                             |                              |                               |                              |                                        |                                         |                                          |                                         |                       |
| High: ≥\$1,035                                      | 5,118 (22.9)             | 1,669 (21.6)                | 1,473 (26.4)                 | 1,370 (25.1)                  | 1,691 (19.3)                 | 0.0079                                 | <0.0001                                 | <0.0001                                  | <0.0001                                 | <0.0001               |
| Medium: \$690–\$1,035                               | 9,110 (40.8)             | 3,113 (40.4)                | 2,195 (39.4)                 | 2,286 (41.9)                  | 3,528 (40.3)                 |                                        |                                         |                                          |                                         |                       |
| Low: <\$690                                         | 7,558 (33.9)             | 2,706 (35.1)                | 1,838 (33.0)                 | 1,680 (30.8)                  | 3,270 (37.3)                 |                                        |                                         |                                          |                                         |                       |
| Unknown                                             | 542 (2.4)                | 223 (2.9)                   | 66 (1.2)                     | 122 (2.2)                     | 276 (3.2)                    |                                        |                                         |                                          |                                         |                       |
| <b>Charlson co-morbidity index, mean (SD)</b>       |                          |                             |                              |                               |                              |                                        |                                         |                                          |                                         |                       |
|                                                     | 0.91 (1.49)              | 0.94 (1.53)                 | 0.66 (1.23)                  | 0.84 (1.49)                   | 1.13 (1.59)                  | 0.0771                                 | <0.0001                                 | 0.0018                                   | <0.0001                                 | <0.0001               |

ACO, asthma-chronic obstructive pulmonary disease overlap; SD, standard deviation.

**Supplementary Table 2. Respiratory-related medication use in the 12 months post-index date for the ACO cohort and groups with different ACO definitions**

| Medication type <sup>a</sup> ,<br>n (%)             | ACO cohort<br>(N=22,328) | ACO-I group<br>(n=7,711) | ACO-II group<br>(n=5,572) | ACO-III group<br>(n=5,458) | ACO-IV group<br>(n=8,765) | p-value<br>(ACO cohort<br>vs ACO-I) | p-value<br>(ACO cohort<br>vs ACO-II) | p-value<br>(ACO cohort<br>vs ACO-III) | p-value<br>(ACO cohort<br>vs ACO-IV) | p-value<br>(5 groups) |
|-----------------------------------------------------|--------------------------|--------------------------|---------------------------|----------------------------|---------------------------|-------------------------------------|--------------------------------------|---------------------------------------|--------------------------------------|-----------------------|
| ICS                                                 | 2,482 (11.1)             | 685 (8.9)                | 745 (13.4)                | 605 (11.1)                 | 1,120 (12.8)              | <0.0001                             | <0.0001                              | 0.9472                                | <0.0001                              | <0.0001               |
| LAMA                                                | 2,125 (9.5)              | 764 (9.9)                | 702 (12.6)                | 543 (10.0)                 | 900 (10.3)                | 0.3157                              | <0.0001                              | 0.3321                                | 0.0444                               | <0.0001               |
| LTRA                                                | 2,119 (9.5)              | 653 (8.5)                | 715 (12.8)                | 505 (9.3)                  | 772 (8.8)                 | 0.0075                              | <0.0001                              | 0.5901                                | 0.0622                               | <0.0001               |
| ICS/LABA                                            | 7,820 (35.0)             | 2,422 (31.4)             | 2,659 (47.7)              | 2,046 (37.5)               | 2,990 (34.1)              | <0.0001                             | <0.0001                              | 0.0007                                | 0.1294                               | <0.0001               |
| ICS/LABA+LAMA                                       | 1,373 (6.2)              | 445 (5.8)                | 524 (9.4)                 | 356 (6.5)                  | 611 (7.0)                 | 0.2298                              | <0.0001                              | 0.3061                                | 0.0076                               | <0.0001               |
| SABA                                                | 9,731 (43.6)             | 3,290 (42.7)             | 2,312 (41.5)              | 2,496 (45.7)               | 4,310 (49.2)              | 0.1618                              | 0.0049                               | 0.0041                                | <0.0001                              | <0.0001               |
| SAMA                                                | 2,974 (13.3)             | 957 (12.4)               | 636 (11.4)                | 815 (14.9)                 | 1,408 (16.1)              | 0.0413                              | 0.0002                               | 0.0019                                | <0.0001                              | <0.0001               |
| SABA/SAMA (SABD)                                    | 5,758 (25.8)             | 1,976 (25.6)             | 1,260 (22.6)              | 1,509 (27.7)               | 2,585 (29.5)              | 0.7784                              | <0.0001                              | 0.0051                                | <0.0001                              | <0.0001               |
| SABA+SAMA                                           | 2,836 (12.7)             | 914 (11.9)               | 608 (10.9)                | 780 (14.3)                 | 1,345 (15.4)              | 0.0520                              | 0.0003                               | 0.0018                                | <0.0001                              | <0.0001               |
| Systemic beta<br>agonist (oral)                     | 15,384 (68.9)            | 5,110 (66.3)             | 3,800 (68.2)              | 3,949 (72.4)               | 6,167 (70.4)              | <0.0001                             | 0.3119                               | <0.0001                               | 0.0121                               | <0.0001               |
| Systemic<br>corticosteroid<br>(injection, ≤14 days) | 8,794 (39.4)             | 3,040 (39.4)             | 1,855 (33.3)              | 2,222 (40.7)               | 3,935 (44.9)              | 0.9522                              | <0.0001                              | 0.0728                                | <0.0001                              | <0.0001               |
| Systemic<br>corticosteroid<br>(oral, ≤14 days)      | 10,480 (46.9)            | 3,465 (44.9)             | 2,644 (47.5)              | 2,723 (49.9)               | 4,205 (48.0)              | 0.0024                              | 0.4908                               | <0.0001                               | 0.0989                               | <0.0001               |
| Systemic<br>corticosteroid<br>(oral, >14 days)      | 8,620 (38.6)             | 2,924 (37.9)             | 2,333 (41.9)              | 2,235 (41.0)               | 3,519 (40.2)              | 0.2854                              | <0.0001                              | 0.0015                                | 0.0121                               | <0.0001               |
| Xanthine (injection)                                | 2,611 (11.7)             | 995 (12.9)               | 581 (10.4)                | 656 (12.0)                 | 1,146 (13.1)              | 0.0048                              | 0.0079                               | 0.5037                                | 0.0008                               | <0.0001               |
| Xanthine (oral)                                     | 17,934 (80.3)            | 6,023 (78.1)             | 4,620 (82.9)              | 4,511 (82.7)               | 7,083 (80.8)              | <0.0001                             | <0.0001                              | <0.0001                               | 0.3275                               | <0.0001               |

<sup>a</sup>Only medications prescribed to >5% of patients in the ACO cohort are presented. Categories were not mutually exclusive.

ACO, asthma-chronic obstructive pulmonary disease overlap; ICS, inhaled corticosteroid; LABA, long-acting beta<sub>2</sub>-agonist; LAMA, long-acting muscarinic antagonist; LTRA, leukotriene receptor antagonist; SABA, short-acting beta<sub>2</sub>-agonist; SABD, short-acting bronchodilator; SAMA, short-acting muscarinic antagonist.

**Supplementary Table 3. All-cause medical utilisation in the asthma, COPD and ACO cohorts in the 12 months post-index date**

| Utilisation type                        | ACO cohort<br>(N=22,328) | COPD cohort<br>(N=69,648) | Asthma cohort<br>(N=50,293) | p-value<br>(ACO vs<br>COPD) | p-value<br>(ACO vs<br>asthma) | p-value<br>(3 groups) |
|-----------------------------------------|--------------------------|---------------------------|-----------------------------|-----------------------------|-------------------------------|-----------------------|
| <b>Medical utilisation (outpatient)</b> |                          |                           |                             |                             |                               |                       |
| Mean number of outpatient visits (SD)   | 29.87 (20.55)            | 26.93 (18.98)             | 26.39 (18.16)               | <0.0001                     | <0.0001                       | <0.0001               |
| Mean number of ER visits (SD)           | 2.47 (3.26)              | 2.35 (2.96)               | 1.98 (2.37)                 | 0.0011                      | <0.0001                       | <0.0001               |
| <b>Medical utilisation (inpatient)</b>  |                          |                           |                             |                             |                               |                       |
| Mean number of inpatient visits (SD)    | 2.39 (2.04)              | 2.45 (2.14)               | 1.92 (1.70)                 | 0.0190                      | <0.0001                       | <0.0001               |
| Mean number of ICU admissions (SD)      | 1.44 (0.83)              | 1.36 (0.74)               | 1.27 (0.66)                 | <0.0001                     | <0.0001                       | <0.0001               |
| <b>X-rays, n (%)</b>                    | 15,651 (70.1)            | 48,737 (70.0)             | 25,696 (51.1)               | 0.7342                      | <0.0001                       | <0.0001               |
| <b>Computed tomography, n (%)</b>       | 5,202 (23.3)             | 19,431 (27.9)             | 7,607 (15.1)                | <0.0001                     | <0.0001                       | <0.0001               |
| <b>Pulmonary function tests, n (%)</b>  | 5,298 (23.7)             | 12,437 (17.9)             | 8,686 (17.3)                | <0.0001                     | <0.0001                       | <0.0001               |
| <b>Exacerbations, n (%)</b>             |                          |                           |                             |                             |                               |                       |
| Event 1 <sup>a</sup>                    | 7,883 (35.3)             | 12,934 (18.6)             | 14,583 (29.0)               | <0.0001                     | <0.0001                       | <0.0001               |
| Event 2 <sup>b</sup>                    | 2,207 (9.9)              | 3,658 (5.3)               | 1,876 (3.7)                 | <0.0001                     | <0.0001                       | <0.0001               |
| Event 3 <sup>c</sup>                    | 3,083 (13.8)             | 5,068 (7.3)               | 2,577 (5.1)                 | <0.0001                     | <0.0001                       | <0.0001               |

<sup>a</sup>Event 1 for:

- COPD: visits with ICD-9 code of 491, 492 or 496 with prescription of systemic corticosteroids for <14 days
- Asthma: visits with ICD-9 code of 493 with prescription of systemic corticosteroids for <14 days
- ACO: combination of COPD and asthma event

<sup>b</sup>Event 2 for:

- COPD: visits with ICD-9 code of 491, 492 or 496, and 480–486, with prescription of systemic corticosteroids for <14 days
- Asthma: visits with ICD-9 code of 493 and 480–486, with prescription of systemic corticosteroids for <14 days
- ACO: combination of COPD and asthma event

<sup>c</sup>Event 3 for:

- COPD: visits with ICD-9 code of 491.21 with prescription of systemic corticosteroids for <14 days
- Asthma: visits with ICD-9-CM code of 493.92 with prescription of systemic corticosteroids for <14 days
- ACO: combination of COPD and asthma event

ACO, asthma-COPD overlap; COPD, chronic obstructive pulmonary disease; ER, emergency room; ICD-9, International Classification of Disease, ninth revision, clinical modification; ICS, inhaled corticosteroids; ICU, intensive care unit; SD, standard deviation.

**Supplementary Table 4. Respiratory-related medical utilisation in the 12 months post-index date for the ACO cohort and groups with different ACO definitions**

| Utilisation type                        | ACO cohort<br>(N=22,328) | ACO-I group<br>(n=7,711) | ACO-II group<br>(n=5,572) | ACO-III group<br>(n=5,458) | ACO-IV group<br>(n=8,765) | p-value<br>(ACO cohort<br>vs ACO-I) | p-value<br>(ACO cohort<br>vs ACO-II) | p-value<br>(ACO cohort<br>vs ACO-III) | p-value<br>(ACO cohort<br>vs ACO-IV) | p-value<br>(5 groups) |
|-----------------------------------------|--------------------------|--------------------------|---------------------------|----------------------------|---------------------------|-------------------------------------|--------------------------------------|---------------------------------------|--------------------------------------|-----------------------|
| <b>Medical utilisation (outpatient)</b> |                          |                          |                           |                            |                           |                                     |                                      |                                       |                                      |                       |
| Mean number of outpatient visits (SD)   | 9.14 (7.48)              | 9.40 (7.61)              | 9.08 (7.46)               | 9.17 (7.29)                | 10.06 (8.14)              | 0.0094                              | 0.6176                               | 0.7676                                | <0.0001                              | <0.0001               |
| Mean number of ER visits (SD)           | 2.01 (3.20)              | 2.10 (3.34)              | 2.43 (4.65)               | 2.05 (3.88)                | 1.90 (2.06)               | 0.4471                              | 0.0051                               | 0.7642                                | 0.2307                               | 0.0139                |
| <b>Medical utilisation (inpatient)</b>  |                          |                          |                           |                            |                           |                                     |                                      |                                       |                                      |                       |
| Mean number of inpatient visits (SD)    | 1.93 (1.54)              | 2.03 (1.64)              | 1.92 (1.59)               | 1.75 (1.41)                | 2.08 (1.65)               | 0.0181                              | 0.9547                               | 0.0002                                | <0.0001                              | <0.0001               |
| Mean number of ICU admissions (SD)      | 1.31 (0.70)              | 1.39 (0.80)              | 1.34 (0.71)               | 1.19 (0.53)                | 1.34 (0.75)               | 0.0366                              | 0.6169                               | 0.0067                                | 0.3245                               | 0.0043                |
| <b>X-rays, n (%)</b>                    | 11,390 (51.0)            | 4,016 (52.1)             | 2,757 (49.5)              | 2,794 (51.2)               | 4,922 (56.2)              | 0.1053                              | 0.0406                               | 0.8128                                | <0.0001                              | <0.0001               |
| <b>Computed Tomography, n (%)</b>       | 2,010 (9.0)              | 702 (9.1)                | 475 (8.5)                 | 510 (9.3)                  | 878 (10.0)                | 0.7881                              | 0.2631                               | 0.4304                                | 0.0055                               | 0.0233                |
| <b>Pulmonary function tests, n (%)</b>  | 4,724 (21.2)             | 1,487 (19.3)             | 1,559 (28.0)              | 1,259 (23.1)               | 1,740 (19.9)              | 0.0005                              | <0.0001                              | 0.0021                                | 0.0107                               | <0.0001               |
| <b>Exacerbations, n (%)</b>             |                          |                          |                           |                            |                           |                                     |                                      |                                       |                                      |                       |
| Event 1 <sup>a</sup>                    | 7,883 (35.3)             | 2,619 (34.0)             | 1,863 (33.4)              | 2,015 (36.9)               | 3,374 (38.5)              | 0.0333                              | 0.0088                               | 0.0257                                | <0.0001                              | <0.0001               |
| Event 2 <sup>b</sup>                    | 2,207 (9.9)              | 813 (10.5)               | 419 (7.5)                 | 526 (9.6)                  | 1,115 (12.7)              | 0.0971                              | <0.0001                              | 0.5825                                | <0.0001                              | <0.0001               |
| Event 3 <sup>c</sup>                    | 3,083 (13.8)             | 1,014 (13.2)             | 714 (12.8)                | 817 (15.0)                 | 1,475 (16.8)              | 0.1468                              | 0.0530                               | 0.0269                                | <0.0001                              | <0.0001               |

<sup>a</sup>Event 1 for:

- COPD: visits with ICD-9 code of 491, 492 or 496 with prescription of systemic corticosteroids for <14 days
- Asthma: visits with ICD-9 code of 493 with prescription of systemic corticosteroids for <14 days
- ACO: combination of COPD and asthma event

<sup>b</sup>Event 2 for:

- COPD: visits with ICD-9 code of 491, 492 or 496, and 480–486, with prescription of systemic corticosteroids for <14 days
- Asthma: visits with ICD-9 code of 493 and 480–486, with prescription of systemic corticosteroids for <14 days
- ACO: combination of COPD and asthma event

<sup>c</sup>Event 3 for:

- COPD: visits with ICD-9 code of 491.21 with prescription of systemic corticosteroids for <14 days
- Asthma: visits with ICD-9-CM code of 493.92 with prescription of systemic corticosteroids for <14 days
- ACO: combination of COPD and asthma event

ACO, asthma-COPD overlap; COPD, chronic obstructive pulmonary disease; ER, emergency room; ICD-9, International Classification of Disease, ninth revision, clinical modification; ICS, inhaled corticosteroids; ICU, intensive care unit; SD, standard deviation.
